# Supplementary material for: Epigenetic clock analysis of blood samples from Japanese schizophrenia patients
Source: PubMed Central journal article supplement (PMC6393510; doi:10.1038/s41537-019-0072-1), 2019-02-27
Supplement: 41537_2019_72_MOESM2_ESM.pdf [file 41537_2019_72_MOESM2_ESM.pdf]

**Supplementary Fig. 1.** Epigenetic age acceleration analysis of the GSE38873 dataset.

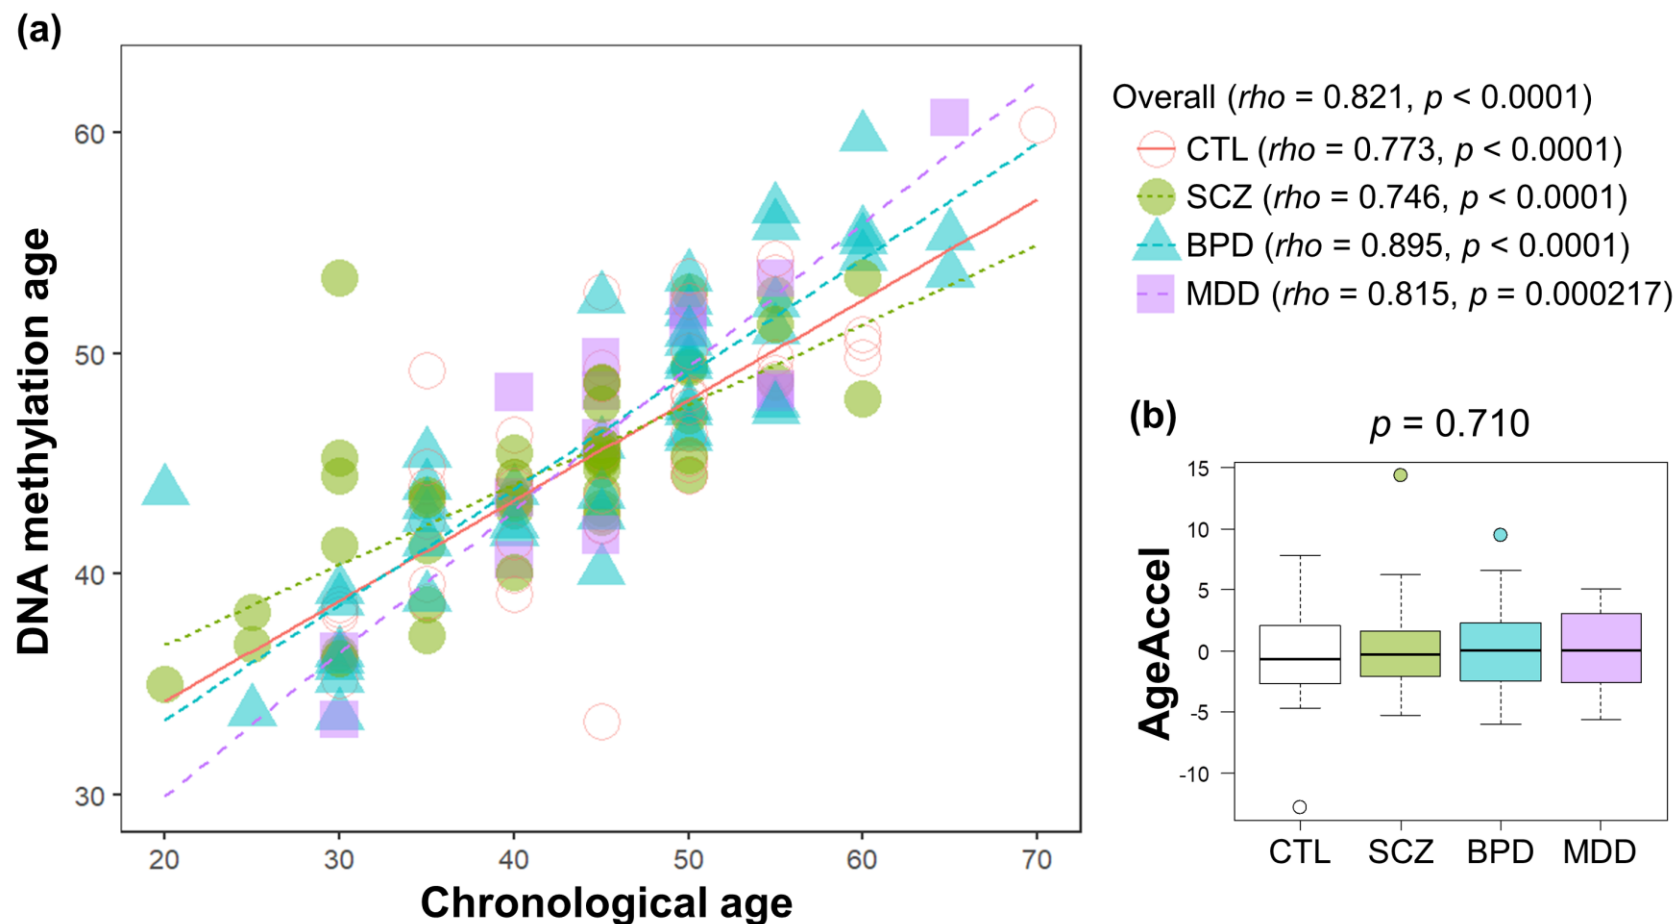

**(a)** Scatter-plot of DNA methylation age vs. chronological age. Spearman's correlation analysis indicates a significant positive correlation between chronological age and DNA methylation age in each group. **(b)** Box-plots of universal epigenetic age acceleration represent as follows: centerline, median; box limits, upper and lower quartile; whiskers, 1.5 $\times$  interquartile range; points, outliers. Kruskal-Wallis rank sum test was performed for comparisons among SCZ, BPD, MDD, and control groups.

CTL, control; SCZ, schizophrenia; BPD, bipolar disorder; MDD, major depressive disorder; AgeAccel, universal epigenetic age acceleration.

**Supplementary Table 1a.** Comparison of measures of epigenetic age acceleration between acute and chronic schizophrenia in the first cohort.

|                                                      | Acute SCZ               | Chronic SCZ             | <i>P</i> -value      |
|------------------------------------------------------|-------------------------|-------------------------|----------------------|
| <b>Characteristics</b>                               |                         |                         |                      |
| Number                                               | 40 (4 pools)            | 40 (4 pools)            |                      |
| Sex (male/female)                                    | 20 / 20                 | 20 / 20                 | 1.000 <sup>b</sup>   |
| Age (years) (mean ± SD)                              | 41.3 ± 12.9             | 39.6 ± 10.4             | 0.531 <sup>c</sup>   |
| Duration of illness (years) (mean ± SD)              | 16.0 ± 12.2             | 15.3 ± 10.4             | 0.804 <sup>c</sup>   |
| Antipsychotic dose <sup>a</sup> (mg/day) (mean ± SD) | 565 ± 710               | 927 ± 717               | 0.0263 <sup>c</sup>  |
| GAF score (mean ± SD)                                | 27.2 ± 7.8              | 40.7 ± 9.6              | < 0.001 <sup>c</sup> |
| BPRS score (mean ± SD)                               | 63.4 ± 11.7             | 45.5 ± 9.0              | < 0.001 <sup>c</sup> |
| <b>Measures of epigenetic age acceleration*</b>      |                         |                         |                      |
| AgeAccel (years) (median [IQR])                      | -0.379 (-1.182, 0.278)  | 0.366 (-0.473, 0.579)   | 0.886 <sup>d</sup>   |
| IEAA (years) (median [IQR])                          | 0.101 (-0.448, 0.594)   | 0.508 (-0.344, 0.984)   | 0.886 <sup>d</sup>   |
| EEAA (years) (median [IQR])                          | -1.537 (-2.282, -0.488) | -0.931 (-1.046, -0.746) | 0.686 <sup>d</sup>   |

SCZ, schizophrenia; GAF, Global Assessment of Functioning; BPRS, Brief Psychiatric Rating Scale; SD, standard deviation; AgeAccel, universal epigenetic age acceleration; IEAA, intrinsic epigenetic age acceleration; EEAA, extrinsic epigenetic age acceleration; IQR, interquartile range.

\* Measures of epigenetic age acceleration were calculated using pooled DNA samples.

<sup>a</sup> Antipsychotic dose was calculated with chlorpromazine equivalents at blood draw.

<sup>b</sup> *P*-value was calculated using  $\chi^2$ -test.

<sup>c</sup> *P*-value was calculated using Student's *t*-test.

<sup>d</sup> *P*-value was calculated using Mann-Whitney U-test.

**Supplementary Table 1b.** Comparison of measures of epigenetic age acceleration between younger and older schizophrenia in the first cohort.

|                                                      | Younger SCZ             | Older SCZ               | <i>P</i> -value      |
|------------------------------------------------------|-------------------------|-------------------------|----------------------|
| <b>Characteristics</b>                               |                         |                         |                      |
| Number                                               | 40 (4 pools)            | 40 (4 pools)            |                      |
| Sex (male/female)                                    | 20 / 20                 | 20 / 20                 | 1.000 <sup>b</sup>   |
| Age (years) (mean ± SD)                              | 31.3 ± 6.8              | 49.6 ± 7.7              | < 0.001 <sup>c</sup> |
| Duration of illness (years) (mean ± SD)              | 10.0 ± 6.0              | 21.3 ± 12.5             | < 0.001 <sup>c</sup> |
| Antipsychotic dose <sup>a</sup> (mg/day) (mean ± SD) | 697 ± 662               | 796 ± 801               | 0.549 <sup>c</sup>   |
| GAF score (mean ± SD)                                | 32.6 ± 11.7             | 35.3 ± 10.2             | 0.276 <sup>c</sup>   |
| BPRS score (mean ± SD)                               | 54.9 ± 13.9             | 53.9 ± 13.7             | 0.747 <sup>c</sup>   |
| <b>Measures of epigenetic age acceleration*</b>      |                         |                         |                      |
| AgeAccel (years) (median [IQR])                      | 0.101 (−0.189, 0.331)   | −0.959 (−2.461, 0.676)  | 0.886 <sup>d</sup>   |
| IEAA (years) (median [IQR])                          | 0.339 (0.096, 0.730)    | −0.104 (−1.263, 0.848)  | 0.686 <sup>d</sup>   |
| EEAA (years) (median [IQR])                          | −0.872 (−1.217, −0.746) | −1.077 (−1.505, −0.576) | 0.686 <sup>d</sup>   |

SCZ, schizophrenia; GAF, Global Assessment of Functioning; BPRS, Brief Psychiatric Rating Scale; SD, standard deviation; AgeAccel, universal epigenetic age acceleration; IEAA, intrinsic epigenetic age acceleration; EEAA, extrinsic epigenetic age acceleration; IQR, interquartile range.

\* Measures of epigenetic age acceleration were calculated using pooled DNA samples.

<sup>a</sup> Antipsychotic dose was calculated with chlorpromazine equivalents at blood draw.

<sup>b</sup> *P*-value was calculated using  $\chi^2$ -test.

<sup>c</sup> *P*-value was calculated using Student's *t*-test.

<sup>d</sup> *P*-value was calculated using Mann-Whitney U-test.

**Supplementary Table 1c.** Comparison of measures of epigenetic age acceleration between younger and older schizophrenia in the second cohort.

|                                                | Younger SCZ (age < 35) | Older SCZ (age ≥ 35)   | <i>P</i> -value       |
|------------------------------------------------|------------------------|------------------------|-----------------------|
| <b>Characteristics</b>                         |                        |                        |                       |
| Number                                         | 14                     | 10                     |                       |
| Sex (male/female)                              | 10 / 4                 | 1 / 9                  | 0.0029 <sup>a</sup>   |
| Age (years) (mean ± SD)                        | 23.0 ± 4.7             | 41.9 ± 4.1             | < 0 .001 <sup>b</sup> |
| <b>Measures of epigenetic age acceleration</b> |                        |                        |                       |
| AgeAccel (years) (median [IQR])                | -0.756 (-3.058, 2.143) | 0.103 (-2.526, 0.852)  | 0.752 <sup>c</sup>    |
| IEAA (years) (median [IQR])                    | -0.502 (-1.094, 0.631) | -0.407 (-1.402, 0.595) | 1.000 <sup>c</sup>    |
| EEAA (years) (median [IQR])                    | -0.738 (-4.630, 0.851) | -1.694 (-3.836, 4.210) | 0.977 <sup>c</sup>    |

SCZ, schizophrenia; SD, standard deviation; AgeAccel, universal epigenetic age acceleration; IEAA, intrinsic epigenetic age acceleration; EEAA, extrinsic epigenetic age acceleration; IQR, interquartile range.

<sup>a</sup> *P*-value was calculated using  $\chi^2$ -test.

<sup>b</sup> *P*-value was calculated using Student's t-test.

<sup>c</sup> *P*-value was calculated using Mann-Whitney U-test.

**Supplementary Table 2a.** Demographic and clinical characteristics, as well as measures of epigenetic age acceleration in the publicly-available blood DNA methylation datasets.

| Cohort                                         | GSE41169 Dutch, Blood     |                           |                     | GSE80417 White British, Blood |                           |                      | GSE84727 White British, Blood |                           |                           |
|------------------------------------------------|---------------------------|---------------------------|---------------------|-------------------------------|---------------------------|----------------------|-------------------------------|---------------------------|---------------------------|
|                                                | Control                   | Schizophrenia             | <i>P</i> -value     | Control                       | Schizophrenia             | <i>P</i> -value      | Control                       | Schizophrenia             | <i>P</i> -value           |
| <b>Characteristics</b>                         |                           |                           |                     |                               |                           |                      |                               |                           |                           |
| Number                                         | 33                        | 62                        |                     | 304                           | 332                       |                      | 405                           | 260                       |                           |
| Sex (male/female)                              | 21 / 12                   | 46 / 16                   | 0.283 <sup>a</sup>  | 135 / 169                     | 242 / 90                  | < 0.001 <sup>a</sup> | 303 / 102                     | 177 / 83                  | 0.0585 <sup>a</sup>       |
| Age (years) (mean ± SD)                        | 29.4 ± 10.3               | 32.7 ± 10.2               | 0.128 <sup>b</sup>  | 36.8 ± 14.7                   | 43.7 ± 14.6               | < 0.001 <sup>b</sup> | 44.9 ± 12.2                   | 44.2 ± 14.1               | 0.515 <sup>b</sup>        |
| <b>Measures of epigenetic age acceleration</b> |                           |                           |                     |                               |                           |                      |                               |                           |                           |
| AgeAccel (years) (median [IQR])                | 0.714<br>(−0.963, 2.181)  | −0.670<br>(−2.351, 2.505) | 0.0877 <sup>c</sup> | 0.288<br>(−2.900, 3.448)      | −0.691<br>(−3.649, 2.996) | 0.121 <sup>c</sup>   | 0.059<br>(−2.515, 3.126)      | −0.550<br>(−3.176, 2.344) | 0.100 <sup>c</sup>        |
| IEAA (years) (median [IQR])                    | 0.745<br>(−0.854, 2.648)  | −0.306<br>(−2.619, 1.730) | 0.147 <sup>c</sup>  | 0.287<br>(−2.743, 3.473)      | 0.129<br>(−3.396, 3.100)  | 0.476 <sup>c</sup>   | −0.061<br>(−2.763, 2.986)     | −0.068<br>(−2.842, 2.445) | 0.273 <sup>c</sup>        |
| EEAA (years) (median [IQR])                    | −0.302<br>(−2.532, 3.927) | 0.407<br>(−3.430, 3.385)  | 0.653 <sup>c</sup>  | −0.360<br>(−3.189, 2.205)     | 0.272<br>(−3.031, 3.823)  | 0.0579 <sup>c</sup>  | −0.233<br>(−3.096, 2.362)     | 0.377<br>(−2.226, 2.921)  | <b>0.0228<sup>c</sup></b> |

AgeAccel, universal epigenetic age acceleration; IEAA, intrinsic epigenetic age acceleration; EEAA, extrinsic epigenetic age acceleration; SD, standard deviation; IQR, interquartile range.

<sup>a</sup> *P*-value was calculated using  $\chi^2$ -test.

<sup>b</sup> *P*-value was calculated using Student's *t*-test.

<sup>c</sup> *P*-value was calculated using Mann-Whitney U-test.

**Supplementary Table 2b.** Demographic and clinical characteristics, as well as measures of epigenetic age acceleration of younger samples in the publicly-available brain DNA methylation dataset.

| Cohort                                         | <b>GSE38873 European, Brain</b> |                        |                       |                       |                      |
|------------------------------------------------|---------------------------------|------------------------|-----------------------|-----------------------|----------------------|
|                                                | CTL                             | SCZ                    | BPD                   | MDD                   | <i>P</i> -value      |
| <b>Characteristics</b>                         |                                 |                        |                       |                       |                      |
| Number                                         | 47                              | 45                     | 46                    | 15                    |                      |
| Age (years) (mean $\pm$ SD)                    | 45.1 $\pm$ 9.1                  | 41.8 $\pm$ 9.4         | 44.8 $\pm$ 11.4       | 46.0 $\pm$ 9.5        | 0.302 <sup>a</sup>   |
| PMI (hours) (mean $\pm$ SD)                    | 28.2 $\pm$ 12.4                 | 32.8 $\pm$ 15.6        | 35.9 $\pm$ 17.6       | 27.5 $\pm$ 10.7       | 0.0559 <sup>a</sup>  |
| pH (mean $\pm$ SD)                             | 6.51 $\pm$ 0.29                 | 6.39 $\pm$ 0.28        | 6.36 $\pm$ 0.30       | 6.18 $\pm$ 0.21       | 0.00115 <sup>a</sup> |
| <b>Measures of epigenetic age acceleration</b> |                                 |                        |                       |                       |                      |
| AgeAccel (years) (median [IQR])                | -0.638 (-2.666, 2.102)          | -0.290 (-2.128, 1.622) | 0.050 (-2.409, 2.206) | 0.027 (-2.579, 3.096) | 0.710 <sup>b</sup>   |

CTL, control; SCZ, schizophrenia; BPD, bipolar disorder; MDD, major depressive disorder; AgeAccel, universal epigenetic age acceleration; PMI, postmortem interval; SD, standard deviation; IQR, interquartile range.

Sex information was not listed in the dataset.

<sup>a</sup> *P*-value was calculated using one-way ANOVA.

<sup>b</sup> *P*-value was calculated using Kruskal-Wallis rank sum test.

**Supplementary Table 3.** Demographic and clinical characteristics, as well as measures of epigenetic age acceleration of DNA pools in the first cohort

| Pooled sample number                           | 1      | 2      | 3      | 4      | 5      | 6      | 7      | 8      | 9      | 10    | 11     | 12     |
|------------------------------------------------|--------|--------|--------|--------|--------|--------|--------|--------|--------|-------|--------|--------|
| <b>Characteristics</b>                         |        |        |        |        |        |        |        |        |        |       |        |        |
| Phenotype                                      | CTL    | CTL    | CTL    | CTL    | aSCZ   | aSCZ   | aSCZ   | aSCZ   | cSCZ   | cSCZ  | cSCZ   | cSCZ   |
| Sex                                            | male   | male   | female | female | male   | male   | female | female | male   | male  | female | female |
| Age (years)                                    | 30.4   | 49.3   | 30.0   | 49.0   | 26.4   | 48.2   | 36.8   | 53.7   | 29.7   | 48.6  | 32.4   | 47.8   |
| Duration of illness (years)                    | -      | -      | -      | -      | 7.3    | 23.1   | 12.5   | 21.0   | 9.1    | 21.3  | 11.2   | 19.9   |
| Antipsychotic dose <sup>a</sup> (mg/day)       | -      | -      | -      | -      | 730    | 555    | 340    | 638    | 871    | 1189  | 846    | 802    |
| GAF score                                      | -      | -      | -      | -      | 27.1   | 28.7   | 23.5   | 29.6   | 38.1   | 40.1  | 41.8   | 42.9   |
| BPRS score                                     | -      | -      | -      | -      | 62.7   | 64.7   | 65.1   | 61.0   | 49.0   | 47.3  | 42.9   | 42.7   |
| <b>Measures of epigenetic age acceleration</b> |        |        |        |        |        |        |        |        |        |       |        |        |
| DNAm age (years)                               | 26.6   | 45.5   | 35.8   | 55.5   | 30.5   | 48.6   | 32.6   | 45.5   | 31.6   | 51.8  | 29.0   | 49.4   |
| AgeAccel (years)                               | 0.217  | -2.747 | -1.004 | 1.807  | 0.759  | 0.006  | 0.192  | -2.254 | 1.196  | 2.457 | -0.979 | 0.352  |
| IEAA (years)                                   | 0.475  | -1.168 | 0.088  | 0.875  | 0.272  | 0.013  | 1.320  | -1.157 | -0.841 | 0.484 | -0.882 | 0.521  |
| EEAA (years)                                   | -2.489 | -2.505 | -0.979 | 0.410  | -0.606 | -1.017 | -0.521 | -0.647 | 2.898  | 3.891 | 2.153  | -0.590 |

CTL, control; aSCZ, acute schizophrenia; cSCZ, chronic schizophrenia; GAF, Global Assessment of Functioning; BPRS, Brief Psychiatric Rating Scale; DNAm age, DNA methylation age; AgeAccel, universal epigenetic age acceleration; IEAA, intrinsic epigenetic age acceleration; EEAA, extrinsic epigenetic age acceleration

We prepared 12 pooled DNA samples from 120 individuals. In each group (control, acute schizophrenia, and chronic schizophrenia), 40 individuals were divided into 4 pools (10 younger males, 10 older males, 10 younger females, and 10 older females). Data for continuous variables of characteristics are presented as the average in each pool.

<sup>a</sup> Antipsychotic dose was calculated with chlorpromazine equivalents at blood draw.
